# Supplementary material for: Structure and stability of cyclic peptide based nanotubes: a molecular dynamics study of the influence of amino acid composition
Source: Royal Society of Chemistry journal article supplement (doi:10.1039/c2cp42030a), 2012-01-01
Supplement: c2cp42030a.pdf [file c2cp42030a.pdf]

## **Structure and Stability of Cyclic Peptide Based Nanotubes: An Molecular Dynamics Study of the Influence of Amino Acid Composition**

Ramadoss Vijayaraj,<sup>†‡</sup> Sofie Van Damme,<sup>‡</sup> Patrick Bultinck,<sup>‡</sup> and Venkatesan Subramanian<sup>†\*</sup>

*Chemical Laboratory, CSIR-Central Leather Research Institute, Adyar, Chennai 600 020, India and  
Department of Inorganic and Physical Chemistry, Ghent University, Krijgslaan 281(S3), Gent 9000,  
Belgium*

### **Electronic Supplementary Information**

\*To whom correspondence should be addressed. E-mail: [subuchem@hotmail.com](mailto:subuchem@hotmail.com)

<sup>†</sup>Central Leather Research Institute.

<sup>‡</sup>Ghent University.

**Table S1:** The average distance (in Å) and standard deviation of the centre of mass distance between C $\alpha$  planes of consecutive chains in various CPNTs.

| CP unit  | AA   |      | AF   |      | AL   |      | AQ   |      | QAEA |      | QL   |      | WL   |      | WL3QL |      |
|----------|------|------|------|------|------|------|------|------|------|------|------|------|------|------|-------|------|
|          | mean | SD   | mean  | SD   |
| CP1-CP2  | 4.76 | 0.07 | 4.76 | 0.06 | 4.74 | 0.06 | 4.76 | 0.05 | 4.76 | 0.06 | 4.76 | 0.06 | 4.87 | 0.07 | 4.84  | 0.06 |
| CP2- CP3 | 4.78 | 0.06 | 4.88 | 0.07 | 4.85 | 0.07 | 4.81 | 0.06 | 4.81 | 0.06 | 4.85 | 0.06 | 4.84 | 0.06 | 4.84  | 0.06 |
| CP3- CP4 | 4.78 | 0.06 | 4.77 | 0.06 | 4.76 | 0.06 | 4.76 | 0.05 | 4.77 | 0.05 | 4.77 | 0.05 | 4.90 | 0.07 | 4.85  | 0.06 |
| CP4- CP5 | 4.78 | 0.06 | 4.84 | 0.07 | 4.87 | 0.08 | 4.81 | 0.06 | 4.82 | 0.06 | 4.86 | 0.06 | 4.84 | 0.06 | 4.82  | 0.06 |
| CP5- CP6 | 4.78 | 0.06 | 4.75 | 0.06 | 4.75 | 0.06 | 4.76 | 0.06 | 4.77 | 0.05 | 4.76 | 0.05 | 4.88 | 0.06 | 4.90  | 0.07 |
| CP6- CP7 | 4.78 | 0.06 | 4.87 | 0.07 | 4.85 | 0.07 | 4.82 | 0.06 | 4.82 | 0.06 | 4.87 | 0.06 | 4.85 | 0.06 | 4.83  | 0.06 |
| CP7- CP8 | 4.76 | 0.07 | 4.76 | 0.06 | 4.74 | 0.07 | 4.75 | 0.06 | 4.75 | 0.06 | 4.78 | 0.06 | 4.84 | 0.08 | 4.86  | 0.07 |

**Table S2:** The average diameter of each CP unit (in Å) and the standard deviation (SD) with respect to the longest C $\alpha$ -C $\alpha$  distance.

| CP unit | C $\alpha$ -C $\alpha$ distance | AA   |      | AF    |      | AL    |      | AQ   |      | QAEA  |      | QL    |      | WL    |      | WL3QL |      |
|---------|---------------------------------|------|------|-------|------|-------|------|------|------|-------|------|-------|------|-------|------|-------|------|
|         |                                 | mean | SD   | mean  | SD   | mean  | SD   | mean | SD   | mean  | SD   | mean  | SD   | mean  | SD   | mean  | SD   |
| CP1     | 1                               | 9.74 | 0.44 | 9.65  | 0.40 | 9.72  | 0.38 | 9.68 | 0.41 | 9.72  | 0.39 | 9.43  | 0.40 | 10.38 | 0.38 | 9.40  | 0.48 |
|         | 2                               | 9.79 | 0.68 | 9.92  | 0.57 | 10.22 | 0.55 | 9.77 | 0.52 | 10.09 | 0.49 | 10.18 | 0.51 | 10.46 | 0.37 | 9.82  | 0.43 |
|         | 3                               | 9.73 | 0.44 | 9.75  | 0.40 | 9.48  | 0.38 | 9.71 | 0.41 | 9.58  | 0.39 | 9.86  | 0.38 | 8.90  | 0.40 | 10.09 | 0.40 |
|         | 4                               | 9.81 | 0.67 | 9.63  | 0.59 | 9.59  | 0.65 | 9.98 | 0.52 | 9.74  | 0.51 | 9.69  | 0.56 | 9.38  | 0.40 | 10.09 | 0.43 |
| CP2     | 1                               | 9.81 | 0.40 | 9.79  | 0.37 | 9.79  | 0.36 | 9.77 | 0.37 | 9.83  | 0.37 | 9.85  | 0.30 | 9.78  | 0.29 | 9.98  | 0.29 |
|         | 2                               | 9.79 | 0.41 | 10.03 | 0.32 | 9.72  | 0.33 | 9.83 | 0.37 | 9.71  | 0.39 | 10.02 | 0.35 | 9.90  | 0.29 | 10.22 | 0.27 |
|         | 3                               | 9.75 | 0.40 | 9.72  | 0.37 | 9.57  | 0.36 | 9.77 | 0.37 | 9.76  | 0.37 | 9.62  | 0.30 | 10.00 | 0.30 | 9.80  | 0.32 |
|         | 4                               | 9.74 | 0.41 | 9.87  | 0.34 | 10.26 | 0.32 | 9.86 | 0.37 | 9.92  | 0.39 | 10.06 | 0.31 | 9.63  | 0.30 | 9.50  | 0.31 |
| CP3     | 1                               | 9.77 | 0.38 | 9.74  | 0.36 | 9.69  | 0.33 | 9.74 | 0.36 | 9.77  | 0.35 | 9.71  | 0.27 | 9.87  | 0.29 | 9.79  | 0.34 |

|                  |      |      |      |       |      |       |      |      |      |      |      |       |      |       |      |       |      |
|------------------|------|------|------|-------|------|-------|------|------|------|------|------|-------|------|-------|------|-------|------|
|                  | 2    | 9.82 | 0.39 | 9.99  | 0.31 | 9.82  | 0.36 | 9.72 | 0.39 | 9.77 | 0.36 | 10.00 | 0.30 | 10.13 | 0.30 | 9.86  | 0.27 |
|                  | 3    | 9.77 | 0.38 | 9.73  | 0.35 | 9.59  | 0.33 | 9.77 | 0.35 | 9.73 | 0.35 | 9.77  | 0.27 | 9.88  | 0.30 | 9.76  | 0.28 |
|                  | 4    | 9.76 | 0.39 | 9.96  | 0.31 | 10.15 | 0.38 | 9.97 | 0.38 | 9.91 | 0.35 | 10.08 | 0.29 | 9.58  | 0.28 | 9.86  | 0.28 |
| CP4              | 1    | 9.78 | 0.38 | 9.74  | 0.33 | 9.68  | 0.35 | 9.76 | 0.36 | 9.73 | 0.35 | 9.65  | 0.30 | 9.91  | 0.28 | 9.99  | 0.26 |
|                  | 2    | 9.80 | 0.38 | 9.73  | 0.34 | 10.35 | 0.36 | 9.84 | 0.36 | 9.81 | 0.38 | 10.03 | 0.33 | 10.00 | 0.31 | 10.14 | 0.26 |
|                  | 3    | 9.79 | 0.38 | 9.82  | 0.33 | 9.63  | 0.34 | 9.78 | 0.36 | 9.77 | 0.36 | 9.84  | 0.29 | 9.93  | 0.26 | 9.81  | 0.28 |
|                  | 4    | 9.76 | 0.38 | 9.82  | 0.36 | 9.56  | 0.47 | 9.83 | 0.36 | 9.95 | 0.36 | 10.01 | 0.37 | 9.67  | 0.30 | 9.62  | 0.29 |
| CP5              | 1    | 9.76 | 0.39 | 9.70  | 0.34 | 9.50  | 0.34 | 9.83 | 0.37 | 9.75 | 0.35 | 9.74  | 0.34 | 9.42  | 0.27 | 10.04 | 0.29 |
|                  | 2    | 9.76 | 0.38 | 9.91  | 0.33 | 10.11 | 0.49 | 9.67 | 0.39 | 9.84 | 0.36 | 9.84  | 0.41 | 10.21 | 0.30 | 9.52  | 0.30 |
|                  | 3    | 9.79 | 0.39 | 9.84  | 0.33 | 9.73  | 0.35 | 9.75 | 0.37 | 9.72 | 0.35 | 9.55  | 0.34 | 10.32 | 0.27 | 9.71  | 0.31 |
|                  | 4    | 9.80 | 0.38 | 9.77  | 0.33 | 9.92  | 0.50 | 9.93 | 0.37 | 9.93 | 0.35 | 10.24 | 0.36 | 9.37  | 0.35 | 9.92  | 0.31 |
| CP6              | 1    | 9.78 | 0.40 | 9.80  | 0.35 | 9.59  | 0.33 | 9.70 | 0.36 | 9.76 | 0.35 | 9.63  | 0.33 | 9.70  | 0.27 | 9.69  | 0.25 |
|                  | 2    | 9.79 | 0.39 | 9.92  | 0.32 | 10.09 | 0.37 | 9.98 | 0.36 | 9.76 | 0.39 | 9.67  | 0.36 | 9.78  | 0.27 | 9.91  | 0.26 |
|                  | 3    | 9.78 | 0.39 | 9.71  | 0.34 | 9.58  | 0.33 | 9.75 | 0.36 | 9.77 | 0.35 | 9.81  | 0.32 | 9.98  | 0.26 | 9.84  | 0.25 |
|                  | 4    | 9.77 | 0.39 | 9.96  | 0.31 | 10.09 | 0.37 | 9.83 | 0.38 | 9.90 | 0.38 | 10.28 | 0.32 | 10.16 | 0.25 | 10.06 | 0.28 |
| CP7              | 1    | 9.81 | 0.40 | 9.78  | 0.36 | 9.67  | 0.36 | 9.75 | 0.38 | 9.76 | 0.36 | 9.80  | 0.41 | 9.93  | 0.29 | 9.70  | 0.40 |
|                  | 2    | 9.78 | 0.41 | 9.79  | 0.36 | 10.12 | 0.34 | 9.78 | 0.38 | 9.88 | 0.34 | 9.77  | 0.33 | 9.29  | 0.34 | 9.61  | 0.32 |
|                  | 3    | 9.74 | 0.40 | 9.77  | 0.36 | 9.56  | 0.36 | 9.79 | 0.38 | 9.70 | 0.36 | 9.56  | 0.35 | 9.82  | 0.30 | 10.05 | 0.31 |
|                  | 4    | 9.77 | 0.41 | 10.01 | 0.33 | 10.10 | 0.34 | 9.91 | 0.39 | 9.92 | 0.35 | 10.17 | 0.40 | 10.24 | 0.38 | 9.95  | 0.32 |
| CP8              | 1    | 9.75 | 0.46 | 9.74  | 0.40 | 9.61  | 0.41 | 9.69 | 0.40 | 9.70 | 0.40 | 9.62  | 0.44 | 10.27 | 0.36 | 9.65  | 0.36 |
|                  | 2    | 9.80 | 0.65 | 9.78  | 0.53 | 10.16 | 0.62 | 9.84 | 0.53 | 9.89 | 0.54 | 10.17 | 0.44 | 10.46 | 0.43 | 9.72  | 0.50 |
|                  | 3    | 9.75 | 0.46 | 9.65  | 0.40 | 9.50  | 0.40 | 9.63 | 0.40 | 9.62 | 0.41 | 9.82  | 0.42 | 9.15  | 0.40 | 9.76  | 0.36 |
|                  | 4    | 9.78 | 0.65 | 9.85  | 0.55 | 9.75  | 0.66 | 9.96 | 0.52 | 9.92 | 0.53 | 9.59  | 0.45 | 9.30  | 0.52 | 10.15 | 0.46 |
| 1-8 <sup>a</sup> | 9.78 | 0.43 | 9.81 | 0.37  | 9.81 | 0.40  | 9.80 | 0.39 | 9.80 | 0.38 | 9.85 | 0.36  | 9.84 | 0.32  | 9.84 | 0.33  |      |

<sup>a</sup>average over all the chains

**Table S3:** Various energy contributions (in kcal/mol) to the free energy of binding of each CP unit of different model systems.

| CP unit | $\Delta E_{vdw}$ |      |        |      |        |      |        |      |        |      |        |      |         |      |        |      |
|---------|------------------|------|--------|------|--------|------|--------|------|--------|------|--------|------|---------|------|--------|------|
|         | AA               |      | AF     |      | AL     |      | AQ     |      | QAEA   |      | QL     |      | WL      |      | WL3QL  |      |
|         | AVG              | SD   | AVG    | SD   | AVG    | SD   | AVG    | SD   | AVG    | SD   | AVG    | SD   | AVG     | SD   | AVG    | SD   |
| CP1     | -19.69           | 2.22 | -33.02 | 3.10 | -26.18 | 2.38 | -26.78 | 2.90 | -28.34 | 2.57 | -37.23 | 3.37 | -50.21  | 3.24 | -48.45 | 3.04 |
| CP2     | -37.60           | 3.26 | -66.58 | 4.14 | -54.64 | 3.36 | -52.66 | 3.91 | -53.90 | 3.63 | -75.53 | 3.97 | -96.30  | 3.92 | -93.85 | 3.69 |
| CP3     | -37.90           | 3.41 | -68.41 | 4.36 | -57.12 | 3.24 | -55.13 | 3.80 | -53.94 | 4.15 | -79.11 | 4.09 | -102.75 | 4.17 | -99.96 | 4.11 |
| CP4     | -38.37           | 2.97 | -61.00 | 3.76 | -57.42 | 3.21 | -54.23 | 3.63 | -55.85 | 3.67 | -79.09 | 4.14 | -102.45 | 3.84 | -98.17 | 4.11 |
| CP5     | -38.29           | 3.27 | -59.76 | 3.75 | -56.32 | 3.28 | -54.32 | 3.56 | -56.08 | 3.62 | -77.88 | 4.05 | -106.78 | 4.02 | -93.90 | 4.25 |
| CP6     | -37.95           | 3.12 | -65.51 | 4.28 | -57.44 | 3.39 | -56.17 | 3.82 | -54.78 | 3.66 | -75.49 | 3.97 | -107.85 | 3.58 | -94.81 | 4.81 |
| CP7     | -37.70           | 3.44 | -63.40 | 4.03 | -54.75 | 3.77 | -52.09 | 3.61 | -51.10 | 3.48 | -74.69 | 4.18 | -95.26  | 3.78 | -94.65 | 4.25 |
| CP8     | -19.65           | 2.29 | -31.34 | 2.98 | -24.79 | 2.48 | -24.90 | 2.41 | -24.77 | 2.36 | -38.83 | 3.16 | -45.41  | 2.89 | -48.65 | 3.35 |

  

| CP unit | $\Delta E_{ele}$ |      |        |      |        |      |         |       |        |      |         |       |        |      |        |      |
|---------|------------------|------|--------|------|--------|------|---------|-------|--------|------|---------|-------|--------|------|--------|------|
|         | AA               |      | AF     |      | AL     |      | AQ      |       | QAEA   |      | QL      |       | WL     |      | WL3QL  |      |
|         | AVG              | SD   | AVG    | SD   | AVG    | SD   | AVG     | SD    | AVG    | SD   | AVG     | SD    | AVG    | SD   | AVG    | SD   |
| CP1     | -41.35           | 4.53 | -43.03 | 4.25 | -44.12 | 3.67 | -49.21  | 7.48  | -47.34 | 5.57 | -57.70  | 7.68  | -40.05 | 4.32 | -43.67 | 6.14 |
| CP2     | -84.85           | 5.84 | -79.41 | 5.99 | -82.91 | 5.42 | -98.33  | 9.22  | -93.35 | 7.82 | -107.71 | 10.99 | -84.66 | 5.23 | -89.59 | 7.68 |
| CP3     | -86.56           | 5.44 | -78.94 | 6.26 | -82.68 | 6.05 | -100.06 | 10.04 | -93.19 | 7.74 | -116.13 | 11.11 | -87.78 | 5.15 | -92.84 | 7.17 |
| CP4     | -85.91           | 5.88 | -85.71 | 5.77 | -80.49 | 6.46 | -98.43  | 9.27  | -97.19 | 7.90 | -115.76 | 11.03 | -89.61 | 6.16 | -97.17 | 7.28 |
| CP5     | -85.84           | 5.44 | -85.82 | 5.85 | -81.01 | 6.44 | -99.13  | 9.26  | -98.78 | 9.18 | -111.12 | 11.62 | -88.20 | 5.36 | -94.19 | 8.24 |
| CP6     | -85.99           | 5.21 | -81.02 | 5.68 | -81.49 | 6.24 | -100.78 | 12.11 | -99.13 | 8.39 | -115.34 | 10.45 | -86.06 | 5.45 | -90.56 | 8.22 |
| CP7     | -83.45           | 6.72 | -81.72 | 5.65 | -81.56 | 6.27 | -96.03  | 11.37 | -97.30 | 7.39 | -108.21 | 11.01 | -87.61 | 5.91 | -89.34 | 7.42 |
| CP8     | -39.98           | 5.31 | -43.45 | 3.84 | -44.93 | 4.05 | -46.68  | 6.80  | -46.35 | 5.18 | -54.48  | 7.48  | -43.28 | 4.58 | -43.04 | 5.32 |

|         |         | $\Delta E_{MM}$ |         |      |         |      |         |       |         |      |         |       |         |      |         |      |
|---------|---------|-----------------|---------|------|---------|------|---------|-------|---------|------|---------|-------|---------|------|---------|------|
| CP unit | AA      |                 | AF      |      | AL      |      | AQ      |       | QAEA    |      | QL      |       | WL      |      | WL3QL   |      |
|         | AVG     | SD              | AVG     | SD   | AVG     | SD   | AVG     | SD    | AVG     | SD   | AVG     | SD    | AVG     | SD   | AVG     | SD   |
| CP1     | -61.04  | 3.36            | -76.05  | 3.66 | -70.30  | 3.15 | -75.99  | 6.80  | -75.68  | 5.29 | -94.93  | 7.02  | -90.26  | 4.22 | -92.11  | 5.51 |
| CP2     | -122.44 | 4.27            | -145.99 | 4.73 | -137.56 | 4.71 | -150.99 | 8.41  | -147.25 | 7.01 | -183.24 | 10.07 | -180.96 | 5.13 | -183.43 | 7.08 |
| CP3     | -124.45 | 3.96            | -147.36 | 4.72 | -139.80 | 4.70 | -155.19 | 8.78  | -147.14 | 6.71 | -195.24 | 11.01 | -190.53 | 5.13 | -192.80 | 6.77 |
| CP4     | -124.29 | 4.53            | -146.71 | 4.66 | -137.91 | 5.38 | -152.66 | 8.53  | -153.04 | 7.14 | -194.85 | 10.01 | -192.06 | 5.64 | -195.34 | 6.44 |
| CP5     | -124.13 | 4.06            | -145.58 | 4.91 | -137.33 | 5.13 | -153.45 | 8.51  | -154.85 | 8.39 | -188.99 | 10.79 | -194.98 | 5.46 | -188.09 | 8.34 |
| CP6     | -123.94 | 3.98            | -146.53 | 4.68 | -138.93 | 4.73 | -156.94 | 11.18 | -153.91 | 7.64 | -190.82 | 9.44  | -193.91 | 5.03 | -185.37 | 8.69 |
| CP7     | -121.15 | 5.08            | -145.12 | 4.65 | -136.31 | 4.99 | -148.13 | 10.28 | -148.41 | 6.47 | -182.90 | 9.37  | -182.86 | 5.49 | -184.00 | 6.60 |
| CP8     | -59.63  | 4.29            | -74.79  | 3.27 | -69.71  | 3.43 | -71.58  | 6.25  | -71.12  | 4.97 | -93.31  | 6.72  | -88.70  | 4.32 | -91.69  | 4.97 |

|         |       | $\Delta G_{pol}$ |       |      |       |      |       |      |       |      |        |      |       |      |       |      |
|---------|-------|------------------|-------|------|-------|------|-------|------|-------|------|--------|------|-------|------|-------|------|
| CP unit | AA    |                  | AF    |      | AL    |      | AQ    |      | QAEA  |      | QL     |      | WL    |      | WL3QL |      |
|         | AVG   | SD               | AVG   | SD   | AVG   | SD   | AVG   | SD   | AVG   | SD   | AVG    | SD   | AVG   | SD   | AVG   | SD   |
| CP1     | 35.79 | 2.16             | 39.98 | 2.10 | 38.59 | 1.77 | 43.85 | 4.81 | 43.83 | 3.72 | 52.61  | 4.37 | 43.90 | 1.94 | 47.28 | 3.21 |
| CP2     | 72.65 | 2.44             | 75.73 | 2.66 | 72.81 | 2.51 | 89.77 | 6.09 | 87.40 | 4.59 | 98.70  | 6.50 | 88.95 | 2.56 | 94.09 | 4.16 |
| CP3     | 73.49 | 2.21             | 75.99 | 2.85 | 73.67 | 2.42 | 91.25 | 6.32 | 86.68 | 4.65 | 106.38 | 6.93 | 93.16 | 2.53 | 96.47 | 3.66 |
| CP4     | 73.28 | 2.37             | 79.12 | 2.66 | 73.38 | 2.66 | 89.18 | 6.54 | 91.32 | 5.23 | 106.64 | 6.24 | 95.69 | 2.88 | 99.31 | 4.03 |
| CP5     | 73.39 | 2.15             | 78.38 | 2.65 | 74.02 | 2.67 | 91.09 | 6.33 | 92.27 | 5.57 | 102.25 | 7.22 | 95.61 | 2.61 | 96.79 | 5.08 |
| CP6     | 73.21 | 2.09             | 76.16 | 2.62 | 72.25 | 2.87 | 93.86 | 7.90 | 90.88 | 5.70 | 104.36 | 6.04 | 93.69 | 2.80 | 93.02 | 5.41 |
| CP7     | 71.97 | 2.89             | 76.54 | 2.62 | 71.26 | 2.75 | 88.35 | 7.09 | 88.68 | 4.57 | 99.00  | 6.51 | 89.55 | 2.77 | 92.98 | 4.17 |
| CP8     | 35.08 | 2.64             | 39.94 | 2.08 | 39.46 | 1.65 | 41.43 | 4.64 | 41.34 | 3.72 | 50.74  | 4.86 | 43.59 | 2.02 | 46.29 | 3.15 |

| CP unit | $\Delta G_{np}$ |      |       |      |       |      |       |      |       |      |       |      |       |      |       |      |
|---------|-----------------|------|-------|------|-------|------|-------|------|-------|------|-------|------|-------|------|-------|------|
|         | AA              |      | AF    |      | AL    |      | AQ    |      | QAEA  |      | QL    |      | WL    |      | WL3QL |      |
|         | AVG             | SD   | AVG   | SD   | AVG   | SD   | AVG   | SD   | AVG   | SD   | AVG   | SD   | AVG   | SD   | AVG   | SD   |
| CP1     | -1.92           | 0.05 | -3.23 | 0.21 | -2.50 | 0.11 | -2.67 | 0.15 | -2.66 | 0.13 | -3.53 | 0.20 | -4.50 | 0.28 | -4.48 | 0.17 |
| CP2     | -4.84           | 0.06 | -7.46 | 0.18 | -6.34 | 0.11 | -6.37 | 0.18 | -6.24 | 0.17 | -8.28 | 0.17 | -9.37 | 0.19 | -9.27 | 0.21 |
| CP3     | -4.84           | 0.06 | -7.37 | 0.17 | -6.49 | 0.10 | -6.47 | 0.17 | -6.15 | 0.17 | -8.68 | 0.19 | -9.92 | 0.25 | -9.63 | 0.18 |
| CP4     | -4.84           | 0.06 | -6.70 | 0.20 | -6.50 | 0.10 | -6.32 | 0.19 | -6.36 | 0.19 | -8.67 | 0.17 | -9.70 | 0.15 | -9.41 | 0.17 |
| CP5     | -4.83           | 0.06 | -6.55 | 0.22 | -6.40 | 0.11 | -6.34 | 0.17 | -6.37 | 0.15 | -8.50 | 0.16 | -9.94 | 0.20 | -9.00 | 0.24 |
| CP6     | -4.84           | 0.07 | -7.12 | 0.19 | -6.58 | 0.11 | -6.63 | 0.17 | -6.26 | 0.15 | -8.28 | 0.17 | -9.97 | 0.14 | -9.11 | 0.29 |
| CP7     | -4.85           | 0.07 | -7.21 | 0.20 | -6.45 | 0.12 | -6.27 | 0.16 | -6.00 | 0.16 | -8.11 | 0.17 | -9.14 | 0.16 | -9.32 | 0.18 |
| CP8     | -1.93           | 0.06 | -3.07 | 0.18 | -2.40 | 0.12 | -2.41 | 0.16 | -2.34 | 0.15 | -3.58 | 0.13 | -3.76 | 0.17 | -4.22 | 0.21 |

| CP unit | $\Delta G_{solv}$ |      |       |      |       |      |       |      |       |      |       |      |       |      |       |      |
|---------|-------------------|------|-------|------|-------|------|-------|------|-------|------|-------|------|-------|------|-------|------|
|         | AA                |      | AF    |      | AL    |      | AQ    |      | QAEA  |      | QL    |      | WL    |      | WL3QL |      |
|         | AVG               | SD   | AVG   | SD   | AVG   | SD   | AVG   | SD   | AVG   | SD   | AVG   | SD   | AVG   | SD   | AVG   | SD   |
| CP1     | 33.86             | 2.18 | 36.75 | 2.12 | 36.09 | 1.79 | 41.17 | 4.76 | 41.17 | 3.69 | 49.09 | 4.34 | 39.40 | 1.87 | 42.81 | 3.17 |
| CP2     | 67.81             | 2.45 | 68.26 | 2.66 | 66.47 | 2.53 | 83.40 | 6.04 | 81.17 | 4.55 | 90.41 | 6.47 | 79.58 | 2.50 | 84.82 | 4.09 |
| CP3     | 68.66             | 2.21 | 68.61 | 2.87 | 67.18 | 2.44 | 84.78 | 6.27 | 80.52 | 4.60 | 97.70 | 6.86 | 83.23 | 2.46 | 86.84 | 3.63 |
| CP4     | 68.44             | 2.37 | 72.42 | 2.65 | 66.88 | 2.67 | 82.87 | 6.45 | 84.96 | 5.15 | 97.97 | 6.19 | 85.99 | 2.84 | 89.90 | 4.04 |
| CP5     | 68.55             | 2.16 | 71.83 | 2.62 | 67.63 | 2.67 | 84.75 | 6.32 | 85.90 | 5.50 | 93.75 | 7.16 | 85.68 | 2.58 | 87.79 | 4.98 |
| CP6     | 68.37             | 2.09 | 69.04 | 2.61 | 65.67 | 2.87 | 87.23 | 7.86 | 84.62 | 5.65 | 96.08 | 5.98 | 83.72 | 2.78 | 83.91 | 5.24 |
| CP7     | 67.12             | 2.90 | 69.32 | 2.65 | 64.81 | 2.75 | 82.09 | 7.05 | 82.68 | 4.54 | 90.89 | 6.48 | 80.41 | 2.72 | 83.66 | 4.10 |
| CP8     | 33.16             | 2.65 | 36.88 | 2.10 | 37.06 | 1.66 | 39.02 | 4.59 | 39.00 | 3.67 | 47.16 | 4.83 | 39.83 | 2.01 | 42.08 | 3.08 |

| CP unit | TΔS    |      |        |      |        |      |        |      |        |      |        |      |        |      |        |      |
|---------|--------|------|--------|------|--------|------|--------|------|--------|------|--------|------|--------|------|--------|------|
|         | AA     |      | AF     |      | AL     |      | AQ     |      | QAEA   |      | QL     |      | WL     |      | WL3QL  |      |
|         | AVG    | SD   |
| CP1     | -16.42 | 1.34 | -20.38 | 4.08 | -18.41 | 1.29 | -18.33 | 1.15 | -18.56 | 1.37 | -23.62 | 1.55 | -26.46 | 1.51 | -25.92 | 1.96 |
| CP2     | -17.18 | 3.10 | -21.35 | 4.90 | -17.75 | 2.88 | -18.31 | 2.94 | -20.18 | 1.20 | -26.06 | 2.41 | -26.35 | 2.02 | -29.40 | 2.31 |
| CP3     | -19.06 | 3.07 | -21.88 | 3.36 | -20.03 | 1.53 | -18.04 | 1.91 | -19.57 | 2.82 | -26.31 | 0.95 | -25.49 | 1.54 | -24.93 | 1.26 |
| CP4     | -18.75 | 1.53 | -21.59 | 3.65 | -21.54 | 4.00 | -17.84 | 1.42 | -20.36 | 3.95 | -25.75 | 1.62 | -28.09 | 2.60 | -27.86 | 2.09 |
| CP5     | -17.75 | 3.15 | -21.50 | 5.49 | -20.79 | 4.60 | -19.02 | 3.27 | -19.02 | 3.47 | -25.62 | 4.79 | -22.86 | 3.49 | -27.21 | 2.50 |
| CP6     | -19.14 | 3.42 | -20.05 | 5.00 | -20.80 | 3.67 | -19.98 | 2.95 | -19.63 | 2.59 | -24.11 | 2.93 | -26.43 | 2.40 | -26.29 | 2.11 |
| CP7     | -19.18 | 5.06 | -19.98 | 3.53 | -20.41 | 1.87 | -20.32 | 1.65 | -20.50 | 1.74 | -24.48 | 4.01 | -25.41 | 2.21 | -26.36 | 0.90 |
| CP8     | -16.38 | 1.06 | -19.57 | 2.48 | -18.21 | 1.94 | -18.78 | 2.02 | -18.08 | 0.66 | -23.22 | 1.82 | -23.53 | 0.95 | -24.99 | 2.71 |

$\Delta E_{\text{vdW}}$  and  $\Delta E_{\text{ele}}$  represent the van der Waals and electrostatic interactions, respectively.  $\Delta E_{\text{MM}}$  results from the addition of  $\Delta E_{\text{vdW}}$  and  $\Delta E_{\text{ele}}$  energy components.  $\Delta G_{\text{pol}}$  and  $\Delta G_{\text{np}}$  denote the polar and non-polar contributions to solvation.  $\Delta G_{\text{solv}}$  is obtained from the addition of  $\Delta G_{\text{pol}}$  and  $\Delta G_{\text{np}}$ . TΔS denotes the addition of TΔS<sub>translational</sub>, TΔS<sub>rotational</sub>, and TΔS<sub>vibrational</sub>.
